# Supplementary material for: Characterization of Erysipelothrix rhusiopathiae Isolates from Diseased Pigs in 15 Chinese Provinces from 2012 to 2018
Source: MDPI journal article supplement (doi:10.3390/microorganisms9122615), 2021-12-17

**Table S1:** Background of *E. rhusiopathiae* used in this study

| Location of isolation | No. of strains isolated from different diseases |           |           |              |               | Total |
|-----------------------|-------------------------------------------------|-----------|-----------|--------------|---------------|-------|
|                       | Septicemia                                      | Urticaria | Arthritis | Endocarditis | Lymphadenitis |       |
| Hubei                 | 13                                              | 10        | 3         | 1            | 1             | 28    |
| Hunan                 | 13                                              | 5         | 7         | 1            |               | 26    |
| Anhui                 | 6                                               | 6         | 5         | 1            | 1             | 19    |
| Henan                 | 3                                               | 2         | 3         | 1            |               | 9     |
| Jiangsu               | 2                                               | 3         | 2         |              |               | 7     |
| Sichuan               |                                                 | 2         | 3         | 1            |               | 6     |
| Shandong              | 2                                               | 1         | 2         | 1            |               | 6     |
| Guangxi               | 2                                               | 3         | 1         |              |               | 6     |
| Jiangxi               | 1                                               | 1         |           | 1            |               | 3     |
| Guangdong             |                                                 | 1         | 1         |              |               | 2     |
| Yunnan                | 1                                               |           | 1         |              |               | 2     |
| Liaoning              |                                                 | 2         |           |              |               | 2     |
| Hebei                 | 1                                               | 1         |           |              |               | 2     |
| Zhejiang              | 1                                               |           |           |              |               | 1     |
| Jilin                 | 1                                               |           |           |              |               | 1     |
| Total                 | 46                                              | 37        | 28        | 7            | 2             | 120   |

**Table S2:** A summary of the antimicrobial resistance of whole genome sequencing isolates

| antibiotics | strains isolated with MIC ( $\mu\text{g/mL}$ ) |       |        |        |        |        |
|-------------|------------------------------------------------|-------|--------|--------|--------|--------|
|             | B18                                            | B52   | B2     | SE25   | SE27   | SE-RD  |
| CTX         | 0.06                                           | 0.06  | 0.06   | 0.06   | 0.06   | 0.06   |
| MEM         | 0.015                                          | 0.015 | 0.015  | 0.015  | 0.015  | 0.015  |
| ERY         | 8                                              | 8     | <0.125 | <0.125 | <0.125 | <0.125 |
| CLI         | >64                                            | >64   | 0.25   | 0.25   | <0.06  | <0.06  |
| TE          | 32                                             | 32    | 2      | 2      | 0.5    | 0.5    |
| EFX         | 4                                              | 4     | 4      | 4      | 4      | 0.125  |
| CIP         | 4                                              | 4     | 4      | 4      | 4      | <0.06  |

A dark area indicates an antibiotic resistance area.

CTX, cefotaxime; MEM, meropenem; ERY, erythromycin; CLI, clindamycin; TE, tetracycline; EFX, enrofloxacin; CIP, ciprofloxacin.

**Table S3:** Primers used in this study

| Functions                                                                            | Primer sequence (5'-3') <sup>a</sup> (forward/reverse)                |
|--------------------------------------------------------------------------------------|-----------------------------------------------------------------------|
| Used to amplify <i>Erm(A)</i> -like and construct <i>E. coli</i> recombinant plasmid | CGGAATTCATGAACCAGAAAAACCCA/<br>CGGGATCCTTACTGAAACAATTTGTAACATTATTA    |
| Used to amplify <i>gyrA</i> and construct <i>E. coli</i> recombinant plasmid         | CGGAATTCATGGAAGATAATACACAGAGTTATG/<br>CGGGATCCTTACTCTGCAATTTCTATTTCTT |
| Used to amplify <i>parC</i> and construct <i>E. coli</i> recombinant plasmid         | CGGAATTCATGTCGCATGATTCATTAA/<br>CGGGATCCTTATAAATCAAGTTTCAAAGGT        |
| Used to amplify the <i>Erm(A)</i> -like and identify its distribution                | ACGAACATTACAGGACAGG/<br>CAATTAAAGGGTGATGACG                           |
| Used to amplify the <i>Erm(T)</i> and identify its distribution                      | TATTGAATATGAGAACTTCCAGGTT/<br>AGTGATATTTTTGAAGGGTGCTT                 |
| Used to amplify the <i>Tet(M)</i> and identify its distribution                      | CGAGGTCAGTCTGAACCTTTG/<br>TTTACAGTCCGTCACATTCC                        |
| Used to amplify the <i>Isa(E)</i> and identify its distribution                      | CTTGCAGCTTTATTCCTTAC/<br>TACTAGACTTACCACTCCCATT                       |
| Used to amplify QRDR of <i>gyrA</i>                                                  | CAGTTCACCGCCGTATTT/<br>CAACCGCAATCCCAGTA                              |
| Used to amplify QRDR of <i>parC</i>                                                  | TTGGTGAACGGTTTGGTAG/CTGCGGCAATCCCTGT                                  |

<sup>a</sup> Underlined nucleotides denote enzyme restriction sites

**Table S4:** Distribution of drug resistant spectra of 120 strains isolated from 2012 to 2018 in China

| Drug resistant spectrums | Number of strains (%) |
|--------------------------|-----------------------|
| Sensitive strain         | 1(0.8)                |
| CIP                      | 8(6.7)                |
| CIP+EFX                  | 27(22.5)              |
| CLI+ERY                  | 8(6.7)                |
| CIP+CLI+ERY              | 4(3.3)                |
| CLI+EFX+CIP              | 11(9.2)               |
| CIP+EFX+CLI+TE           | 8(6.7)                |
| CIP+EFX+CLI+TE+ERY       | 53(44.2)              |

TE, tetracycline; ERY, erythromycin; CLI, clindamycin; CIP, ciprofloxacin; EFX, enrofloxacin.

**Table S5:** General genome features and assembly statistics of 6 isolates

| Characteristic          | Description or value for strain |         |         |         |         |         |
|-------------------------|---------------------------------|---------|---------|---------|---------|---------|
|                         | B18                             | B52     | B2      | SE25    | SE27    | SE-RD   |
| Size(bp)                | 1931527                         | 1891093 | 1855563 | 1820443 | 1743896 | 1765668 |
| G+C (%)                 | 36.36                           | 36.21   | 36.21   | 36.26   | 36.37   | 36.31   |
| CDSs                    | 1840                            | 1800    | 1782    | 1734    | 1661    | 1687    |
| Coding density (%)      | 89.74                           | 89.34   | 89.93   | 89.37   | 89.86   | 89.92   |
| Avg. length of CDSs(bp) | 942.05                          | 938.59  | 936.42  | 938.28  | 943.48  | 941.15  |
| rRNA Locus              | 18                              | 6       | 6       | 7       | 6       | 4       |
| Trna                    | 55                              | 55      | 55      | 55      | 55      | 55      |
| Genome Islands          | 5                               | 4       | 7       | 6       | 3       | 4       |
| Prophage                | 2                               | 1       | 1       | 0       | 0       | 1       |

**Table S6:** Distribution of *Erm(A)-like* and *Erm(T)* in 120 isolates

| distribution<br>of genes | MIC of strains against Erythromycin (µg/mL) |      |     |     |     |       |       |     |     |     |     |      |
|--------------------------|---------------------------------------------|------|-----|-----|-----|-------|-------|-----|-----|-----|-----|------|
|                          | ≤0.125                                      | 0.25 | 0.5 | 1   | 2   | 4     | 8     | 16  | 32  | 64  | 128 | ≥256 |
| <i>Erm(A)-like</i>       | 0/53                                        | 0/2  | 0/1 | 0/0 | 1/1 | 19/19 | 20/20 | 4/4 | 4/4 | 6/6 | 6/6 | 4/4  |
| <i>Erm(T)</i>            | 0/53                                        | 0/2  | 0/1 | 0/0 | 0/1 | 0/19  | 0/20  | 0/4 | 0/4 | 0/6 | 0/6 | 0/4  |

**Table S7:** MICs of ciprofloxacin against 120 isolates and distribution of sequence types of *gyrA-parC*

| MICs of<br>Ciprofloxacin<br>(µg/mL) | No. of<br>strains | distribution of sequence types of <i>gyrA-parC</i>                                      |                                                                                         |                                                                                         |
|-------------------------------------|-------------------|-----------------------------------------------------------------------------------------|-----------------------------------------------------------------------------------------|-----------------------------------------------------------------------------------------|
|                                     |                   | <i>gyrAT</i> <sub>86</sub> - <i>gyrAD</i> <sub>90</sub> -<br><i>parCS</i> <sub>81</sub> | <i>gyrAT</i> <sub>86</sub> - <i>gyrAN</i> <sub>90</sub> -<br><i>parCI</i> <sub>81</sub> | <i>gyrAI</i> <sub>86</sub> - <i>gyrAN</i> <sub>90</sub> -<br><i>parCI</i> <sub>81</sub> |
| ≤0.06                               | 5                 | 5/5                                                                                     | 0/5                                                                                     | 0/5                                                                                     |
| 0.125                               | 0                 | 0/0                                                                                     | 0/0                                                                                     | 0/0                                                                                     |
| 0.25                                | 0                 | 0/0                                                                                     | 0/0                                                                                     | 0/0                                                                                     |
| 0.5                                 | 0                 | 0/0                                                                                     | 0/0                                                                                     | 0/0                                                                                     |
| 1                                   | 5                 | 0/5                                                                                     | 5/5                                                                                     | 0/5                                                                                     |
| 2                                   | 8                 | 0/8                                                                                     | 8/8                                                                                     | 0/8                                                                                     |
| 4                                   | 96                | 0/96                                                                                    | 91/96                                                                                   | 5/96                                                                                    |
| 8                                   | 6                 | 0/6                                                                                     | 6/6                                                                                     | 0/6                                                                                     |
| 16                                  | 0                 | 0/0                                                                                     | 0/0                                                                                     | 0/0                                                                                     |
| 32                                  | 0                 | 0/0                                                                                     | 0/0                                                                                     | 0/0                                                                                     |
| 64                                  | 0                 | 0/0                                                                                     | 0/0                                                                                     | 0/0                                                                                     |
| ≥128                                | 0                 | 0/0                                                                                     | 0/0                                                                                     | 0/0                                                                                     |

**Table S8:** MICs of enrofloxacin against 120 isolates and distribution of sequence types of *gyrA-parC*

| MICs of<br>Enrofloxacin<br>(µg/mL) | No. of<br>strains | distribution of sequence types of <i>gyrA-parC</i>                                      |                                                                                         |                                                                                      |
|------------------------------------|-------------------|-----------------------------------------------------------------------------------------|-----------------------------------------------------------------------------------------|--------------------------------------------------------------------------------------|
|                                    |                   | <i>gyrAT</i> <sub>86</sub> - <i>gyrAD</i> <sub>90</sub> -<br><i>parCS</i> <sub>81</sub> | <i>gyrAT</i> <sub>86</sub> - <i>gyrAN</i> <sub>90</sub> -<br><i>parCI</i> <sub>81</sub> | <i>gyrAI</i> <sub>86</sub> - <i>gyrAN</i> <sub>90</sub> - <i>parCI</i> <sub>81</sub> |
| ≤0.03                              | 0                 | 0/0                                                                                     | 0/0                                                                                     | 0/0                                                                                  |
| 0.06                               | 3                 | 3/3                                                                                     | 0/3                                                                                     | 0/3                                                                                  |
| 0.125                              | 2                 | 2/2                                                                                     | 0/2                                                                                     | 0/2                                                                                  |
| 0.25                               | 0                 | 0/0                                                                                     | 0/0                                                                                     | 0/0                                                                                  |
| 0.5                                | 2                 | 0/2                                                                                     | 2/2                                                                                     | 0/2                                                                                  |
| 1                                  | 4                 | 0/4                                                                                     | 4/4                                                                                     | 0/4                                                                                  |
| 2                                  | 10                | 0/10                                                                                    | 10/10                                                                                   | 0/10                                                                                 |
| 4                                  | 92                | 0/92                                                                                    | 90/92                                                                                   | 2/92                                                                                 |
| 8                                  | 4                 | 0/4                                                                                     | 1/4                                                                                     | 3/4                                                                                  |
| 16                                 | 3                 | 0/3                                                                                     | 3/3                                                                                     | 0/3                                                                                  |
| 32                                 | 0                 | 0/0                                                                                     | 0/0                                                                                     | 0/0                                                                                  |
| ≥64                                | 0                 | 0/0                                                                                     | 0/0                                                                                     | 0/0                                                                                  |

**Table S9:** Distribution of *tet(M)* in 120 isolates

|                                                |        |      |     |      |      |     |     |     |       |      |      |
|------------------------------------------------|--------|------|-----|------|------|-----|-----|-----|-------|------|------|
| MIC of strains against<br>Tetracycline (μg/mL) | ≤0.125 | 0.25 | 0.5 | 1    | 2    | 4   | 8   | 16  | 32    | 64   | ≥128 |
| distribution of <i>tet(M)</i>                  | 0/1    | 0/2  | 0/6 | 0/29 | 7/17 | 1/1 | 2/3 | 0/0 | 24/46 | 9/13 | 2/2  |

**Table S10:** Distribution of *lsa(E)* gene in 120 isolates

|                                               |       |      |      |     |     |     |     |     |     |      |       |
|-----------------------------------------------|-------|------|------|-----|-----|-----|-----|-----|-----|------|-------|
| MIC of strains against<br>Clindamycin (μg/mL) | ≤0.06 | 0.12 | 0.25 | 0.5 | 1   | 2   | 4   | 8   | 16  | 32   | ≥64   |
| distribution of <i>lsa(E)</i>                 | 0/31  | 0/0  | 3/5  | 2/7 | 4/9 | 2/3 | 0/1 | 0/0 | 0/0 | 9/13 | 51/51 |

**Table S11:** Correlation between the antibiotic resistance genotypes and phenotypes of the 120 *E. rhusiopathiae* strains isolated from 2012 to 2018 in China

| Resistance phenotypes | Number of strains | Resistance genotypes                                |
|-----------------------|-------------------|-----------------------------------------------------|
| Sensitive strain      | 1                 | <i>Erm(A)-tet(M)-las(E)-gyrAT86-gyrAD90-parCS81</i> |
| CIP                   | 1                 | <i>Erm(A)+tet(M)+las(E)-gyrAI86-gyrAN90-parCI81</i> |
|                       | 1                 | <i>Erm(A)-tet(M)+las(E)-gyrAT86-gyrAN90-parCI81</i> |
|                       | 6                 | <i>Erm(A)-tet(M)-las(E)-gyrAT86-gyrAN90-parCI81</i> |
|                       | 4                 | <i>Erm(A)+tet(M)+las(E)-gyrAT86-gyrAN90-parCI81</i> |
| CIP+EFX               | 3                 | <i>Erm(A)-tet(M)-las(E)+gyrAT86-gyrAN90-parCI81</i> |
|                       | 20                | <i>Erm(A)-tet(M)-las(E)-gyrAT86-gyrAN90-parCI81</i> |
| CLI+ERY               | 1                 | <i>Erm(A)+tet(M)+las(E)+gyrAT86-gyrAD90-parCS81</i> |
|                       | 1                 | <i>Erm(A)+tet(M)-las(E)+gyrAT86-gyrAD90-parCS81</i> |
|                       | 4                 | <i>Erm(A)+tet(M)-las(E)+gyrAI86-gyrAN90-parCI81</i> |
|                       | 2                 | <i>Erm(A)+tet(M)-las(E)-gyrAT86-gyrAD90-parCS81</i> |
| CIP+CLI+ERY           | 4                 | <i>Erm(A)+tet(M)-las(E)+gyrAT86-gyrAN90-parCI81</i> |
| CLI+EFX+CIP           | 3                 | <i>Erm(A)-tet(M)+las(E)+gyrAT86-gyrAN90-parCI81</i> |
|                       | 6                 | <i>Erm(A)-tet(M)-las(E)+gyrAT86-gyrAN90-parCI81</i> |
|                       | 2                 | <i>Erm(A)-tet(M)-las(E)-gyrAT86-gyrAN90-parCI81</i> |
|                       | 2                 | <i>Erm(A)-tet(M)-las(E)+gyrAT86-gyrAN90-parCI81</i> |
| CIP+EFX+CLI+TE        | 1                 | <i>Erm(A)-tet(M)-las(E)-gyrAT86-gyrAN90-parCI81</i> |
|                       | 1                 | <i>Erm(A)-tet(M)+las(E)+gyrAT86-gyrAN90-parCI81</i> |
|                       | 4                 | <i>Erm(A)-tet(M)+las(E)+gyrAT86-gyrAN90-parCI81</i> |
|                       | 15                | <i>Erm(A)+tet(M)-las(E)+gyrAT86-gyrAN90-parCI81</i> |
| CIP+EFX+CLI+TE+ERY    | 8                 | <i>Erm(A)+tet(M)-las(E)-gyrAT86-gyrAN90-parCI81</i> |
|                       | 27                | <i>Erm(A)+tet(M)+las(E)+gyrAT86-gyrAN90-parCI81</i> |
|                       | 3                 | <i>Erm(A)-tet(M)+las(E)-gyrAT86-gyrAN90-parCI81</i> |

TE: Tetracycline, ERY: Erythromycin, CLI: Clindamycin, CIP: Ciprofloxacin, EFX: Enrofloxacin

Figure S1: Alignment between B2 and SE25

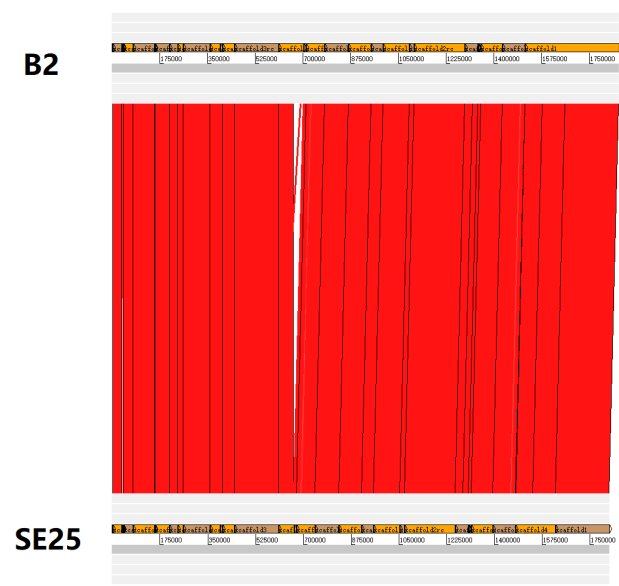

Figure S2: Alignment between B2 and SE27

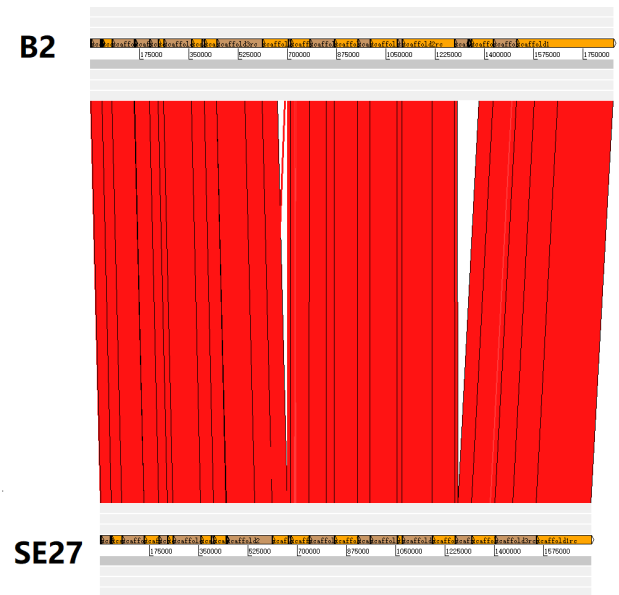

Figure S3: Alignment between B2 and SE-RD

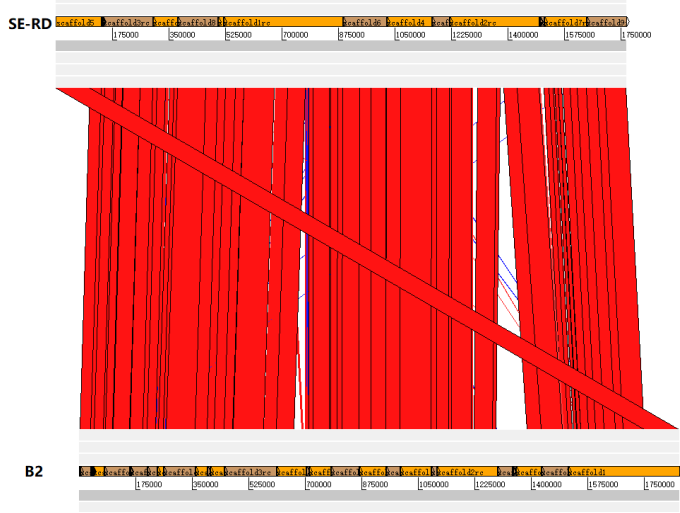

Figure S4: Alignment between B18 and B2

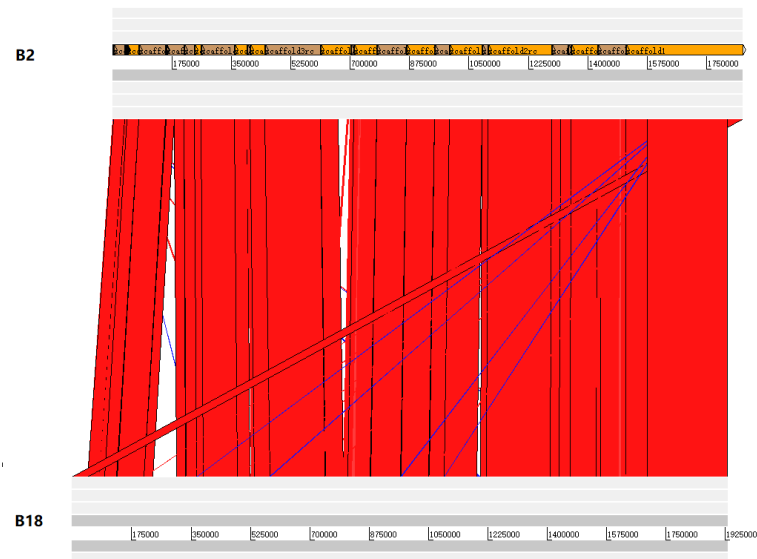

Figure S5: Alignment between B18 and B52

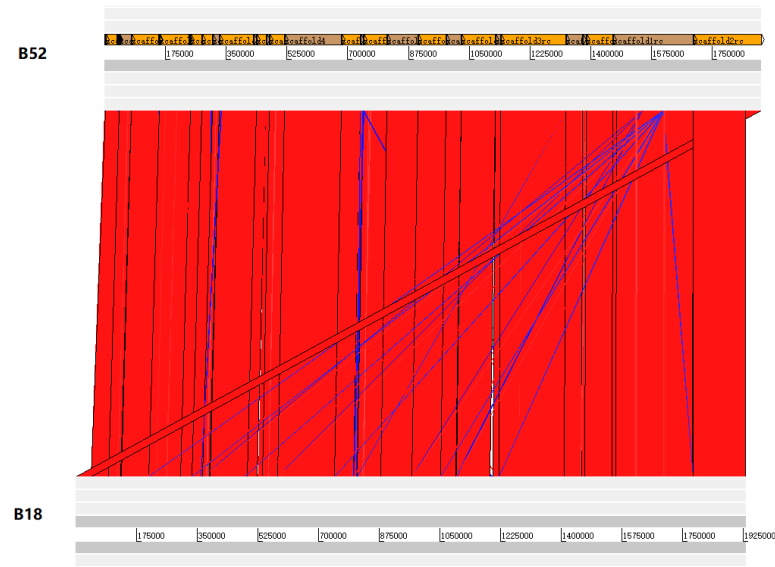

Figure S6: Alignment between B18 and SE25

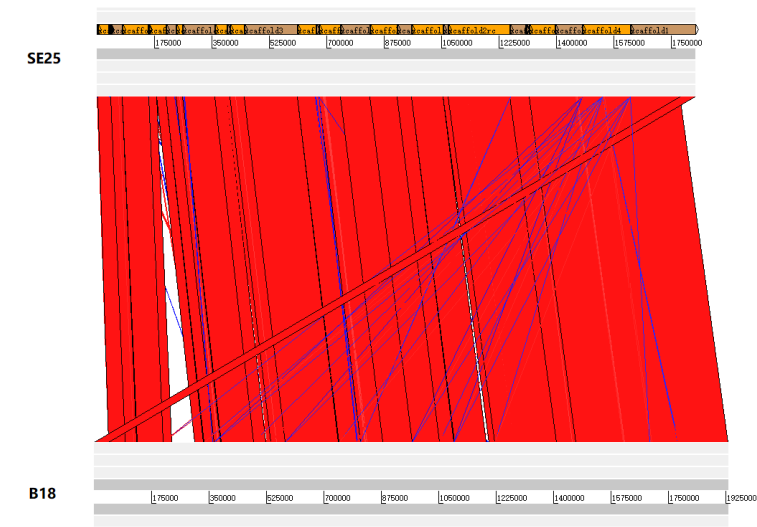

Figure S7: Alignment between B18 and SE27

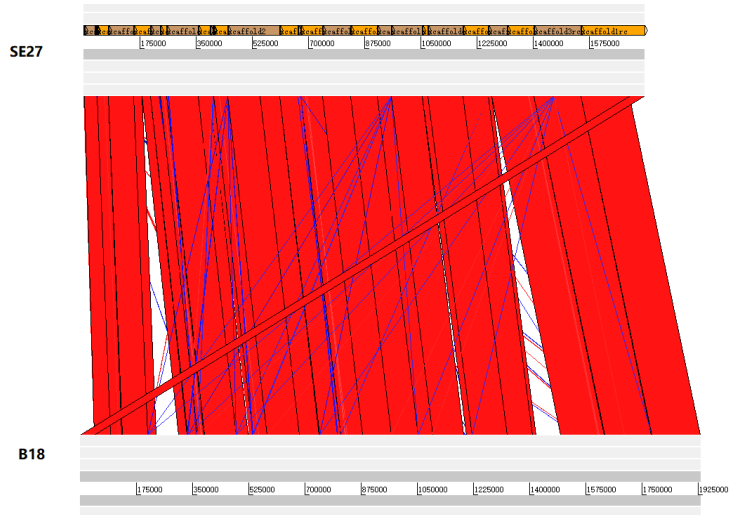

Figure S8: Alignment between B18 and SE-RD

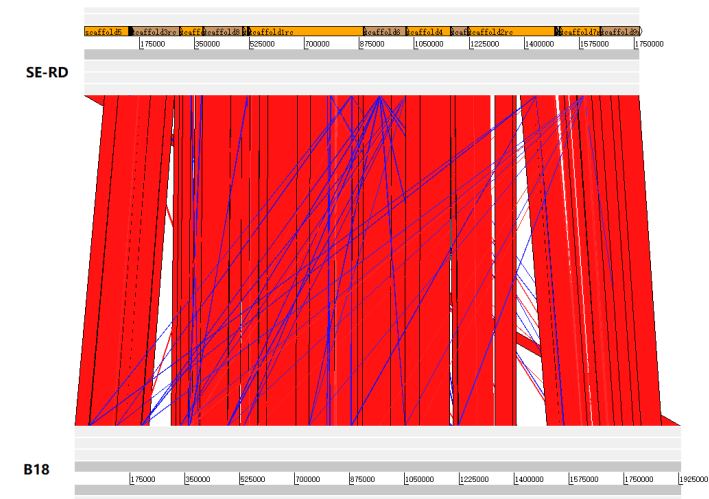

Figure S9: Alignment between B52 and B2

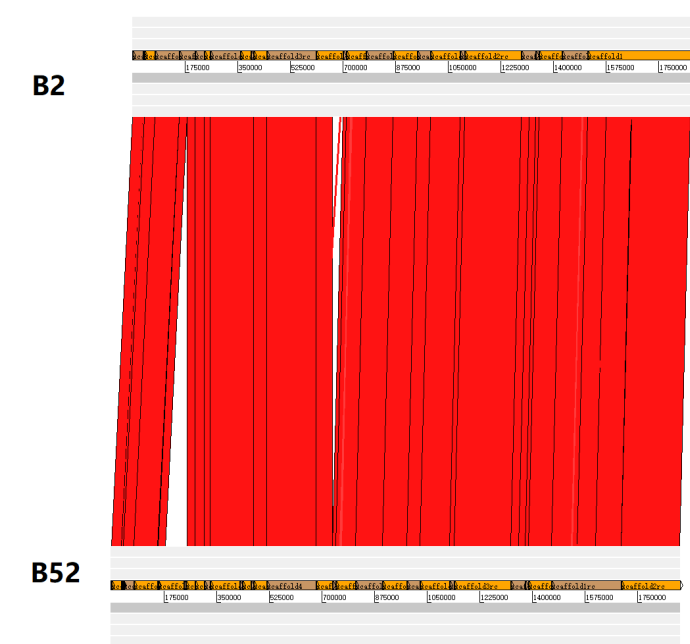

Figure S10: Alignment between B52 and SE25

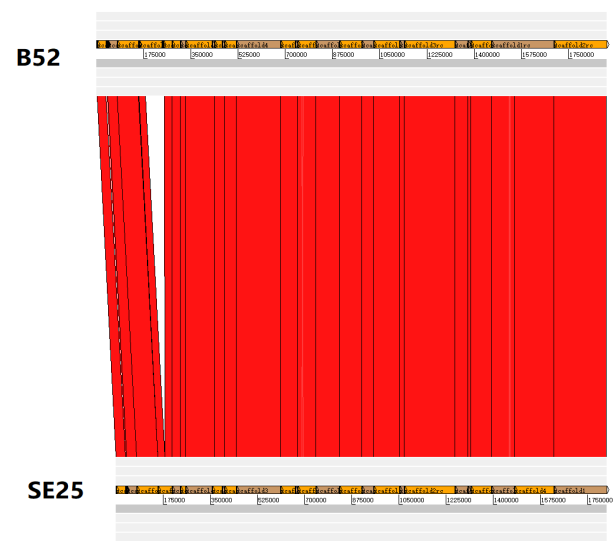

Figure S11: Alignment between B52 and SE27

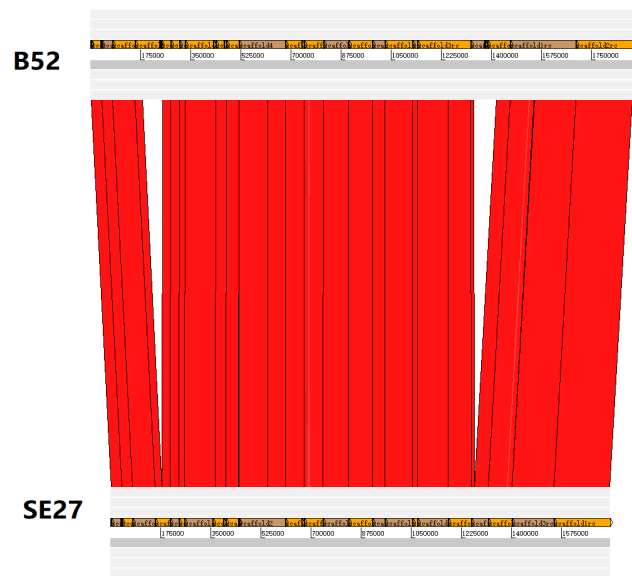

Figure S12: Alignment between B52 and SE-RD

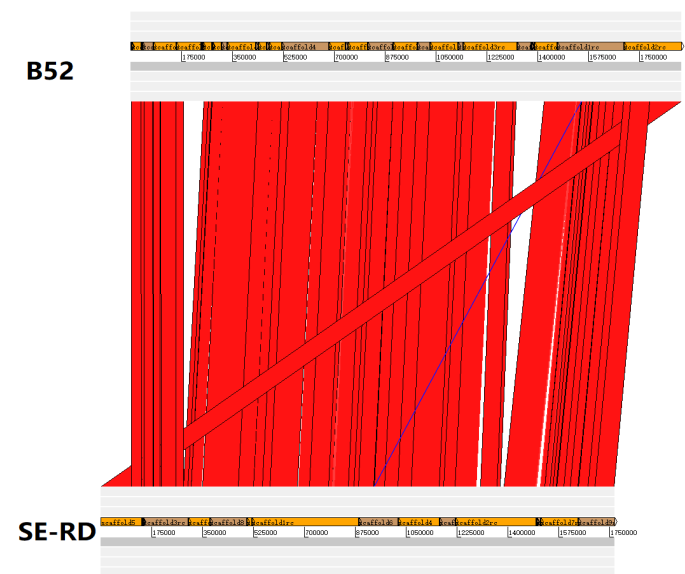



Figure S13: Alignment between SE25 and SE27

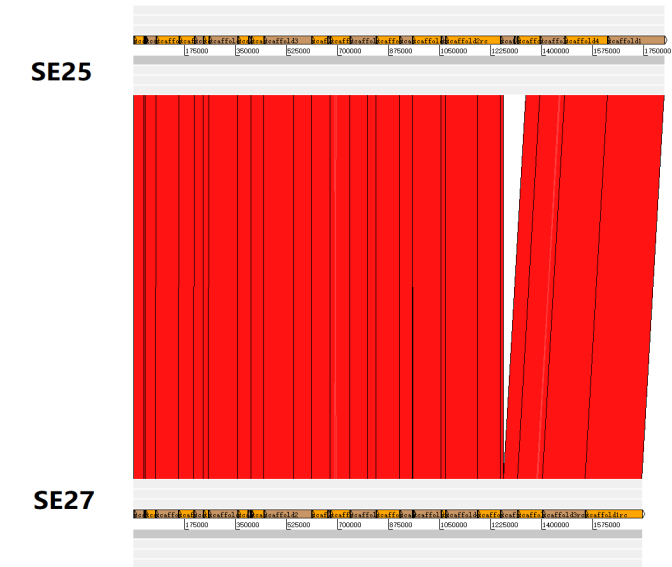

Figure S14: Alignment between SE25 and SE-RD

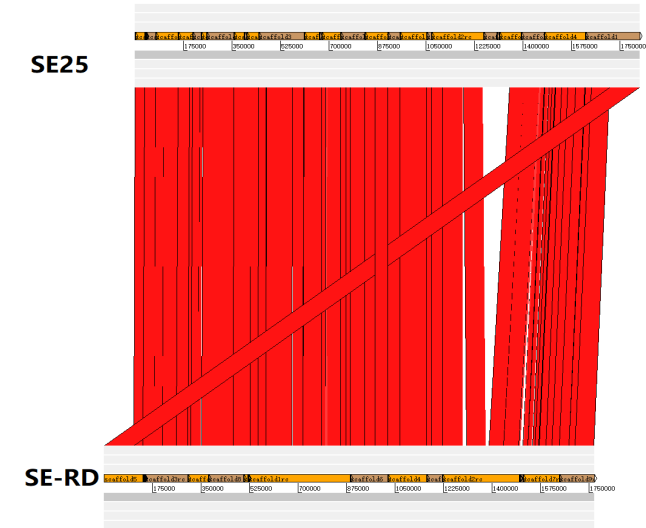

Figure S15: Alignment between SE27 and SE-RD

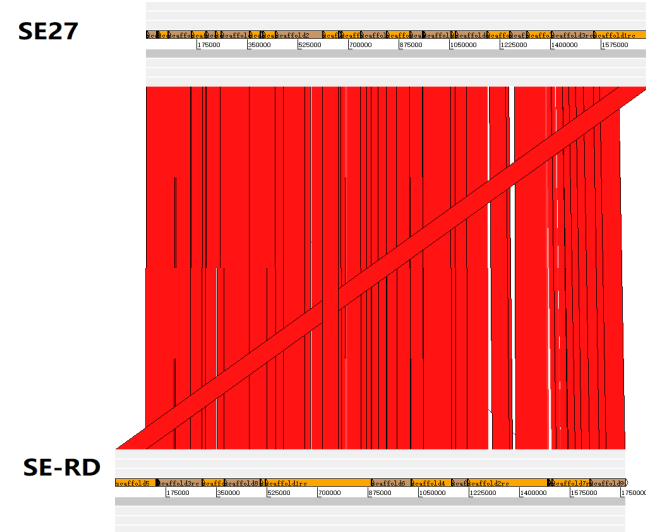

Supplement: s1 [file s1]
